# Supplementary material
Source: PubMed Central journal article supplement (PMC3137702)
Supplement: NIHMS299796-supplement-6.pdf [file NIHMS299796-supplement-6.pdf]

## Supplemental Information

**Supplemental Fig.1.** *dbx1a*, *her4.2*, *nxph1*, *hes5* and *plxnd1* relative expression values (Efficiency based method; Pfaffl, 2001) were plotted in a 3D graph for both groups (WT sib and *mib* mutants). Note a co-variation pattern of expression of these genes; in this example, when *dbx1a* was plotted against *her4.2* and *nxph1* its expression decreased (represented by green color) simultaneously with the increase of *her4.2* and *nxph1* expression (red color) in the 3 dpf WT siblings (A). In *mib* mutants, we observe an opposite pattern, *dbx1a* expression increases (red) with down-regulation of *her4.2* and *nxph1* (green) (B). A similar pattern is shown when *dbx1a* was plotted against *hes5* and *plxnd1* in WT sib (C) and *mib* mutants (D); *dbx1a* is inversely correlated with *Hes5*. Abbreviations: *dbx1a*, developing brain homeobox 1a; *her4.2*, hairy-related 4.2; *hes5*, hairy and enhancer of split 5; *nxph1*, neurexophilin 1 and *plxnd1*, plexin D1.

**Supplemental Table 1.** Pearson correlation coefficients are summarized in this table. The highest correlation coefficients  $>0.70$  or  $< -0.70$  significant at the 0.01 level are indicated by two asterisks and the correlation coefficients  $< 0.7$  or  $>-0.7$  significant at the 0.05 level are indicated by one asterisk.

**Supplemental Table 2.** Primer's sequences, GeneBank accession number and amplicon size for the investigated genes in conventional RT-PCR; primers indicated by asterisks were also used in preparing the probes for In Situ Hybridization DNA (template preparation using PCR amplification).

**Supplemental Table 3.** Real-time qPCR primer sequences and amplicon sizes for the SybrGreen assays.

**Supplemental Table 4.** qPCR efficiencies for all the gene of interest, slope of the curves, intercept and the correlation coefficient were estimated using the equation  $E=10[-1/\text{slope}]$  (qCalculator software). Cycle threshold (CT) values were obtained by the standards serial dilutions assayed in triplicate (4-fold serial dilution).
